# Supplementary material for: Telomere-to-mitochondria signalling by ZBP1 mediates replicative crisis
Source: PubMed Central journal article supplement (PMC9946831; doi:10.1038/s41586-023-05710-8), 2023-02-08
Supplement: 41586_2023_5710_MOESM1_ESM.pdf [file 41586_2023_5710_MOESM1_ESM.pdf]

**Supplementary information**

---

**Telomere-to-mitochondria signalling by ZBP1 mediates replicative crisis**

---

In the format provided by the authors and unedited

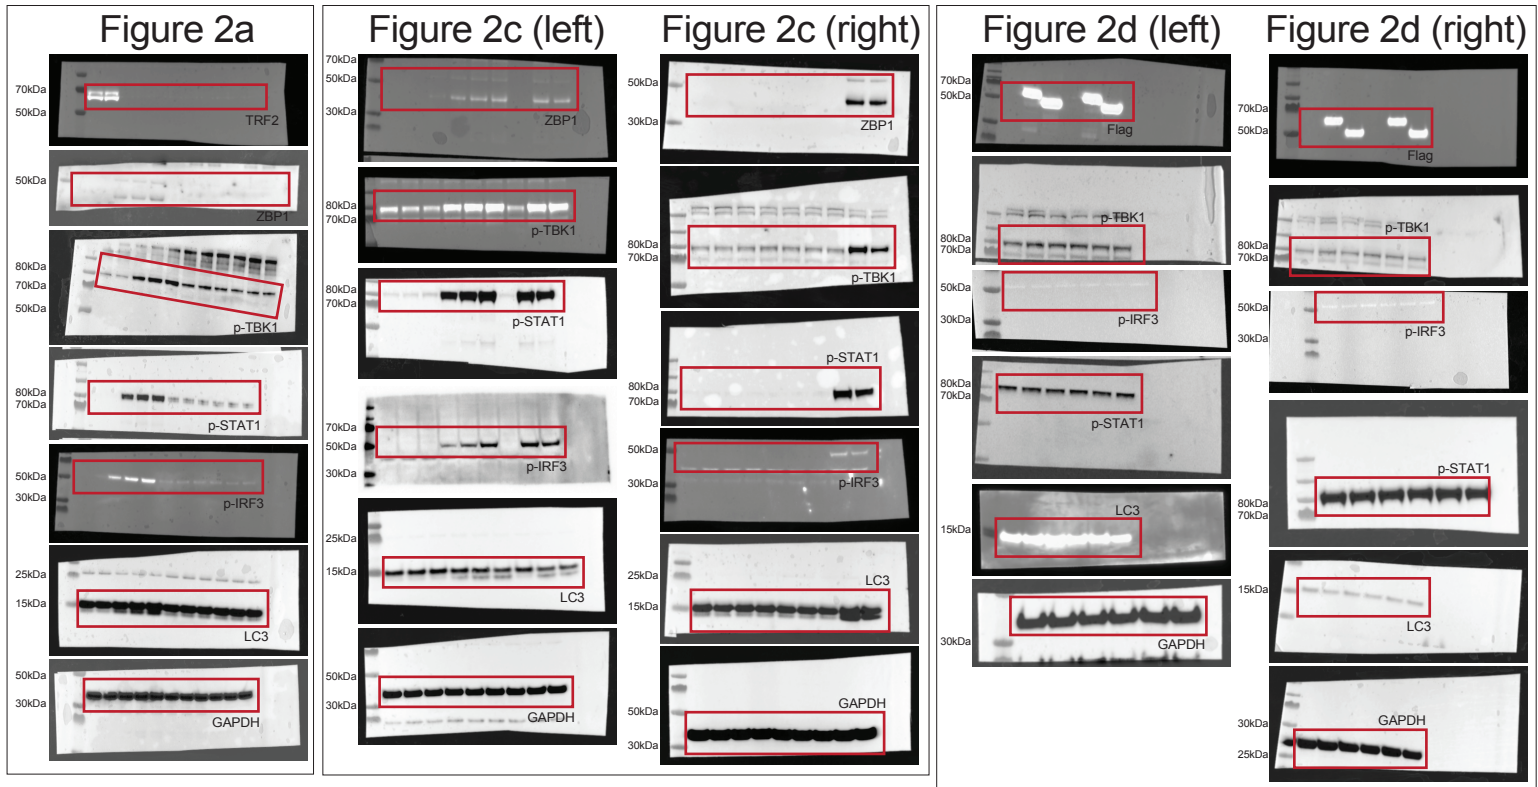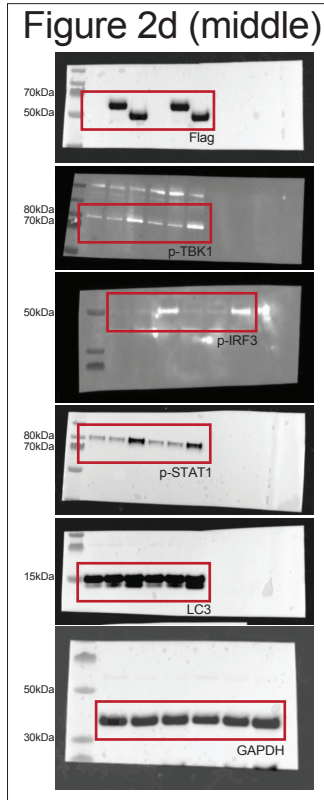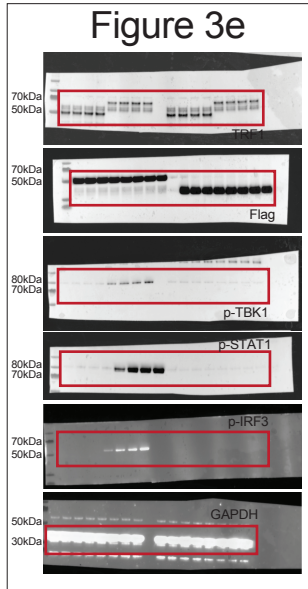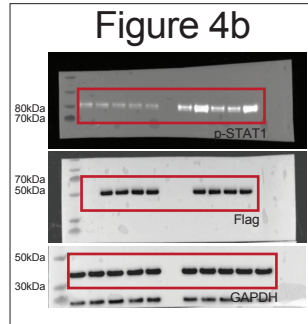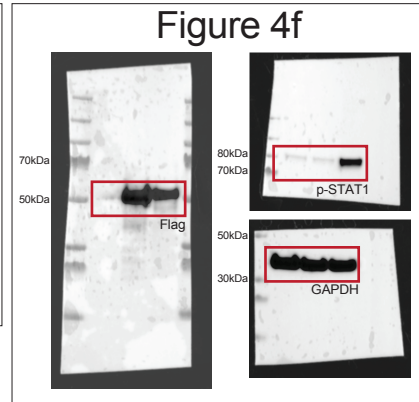

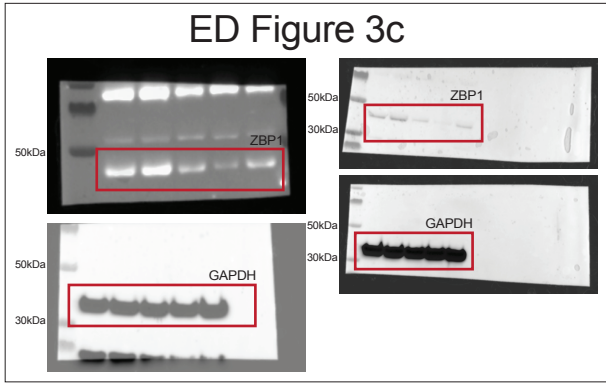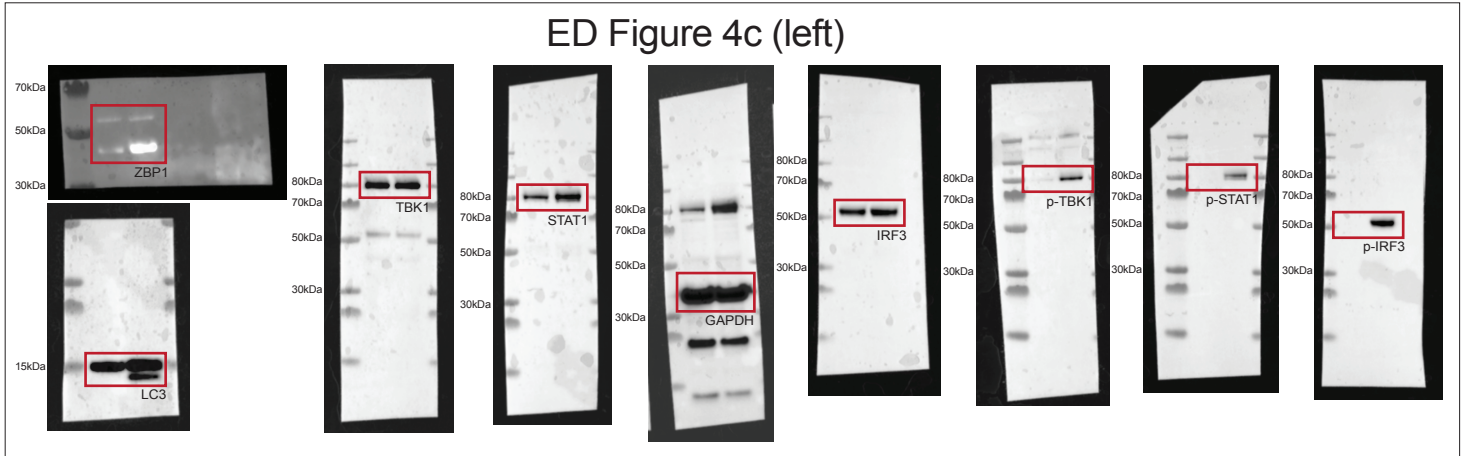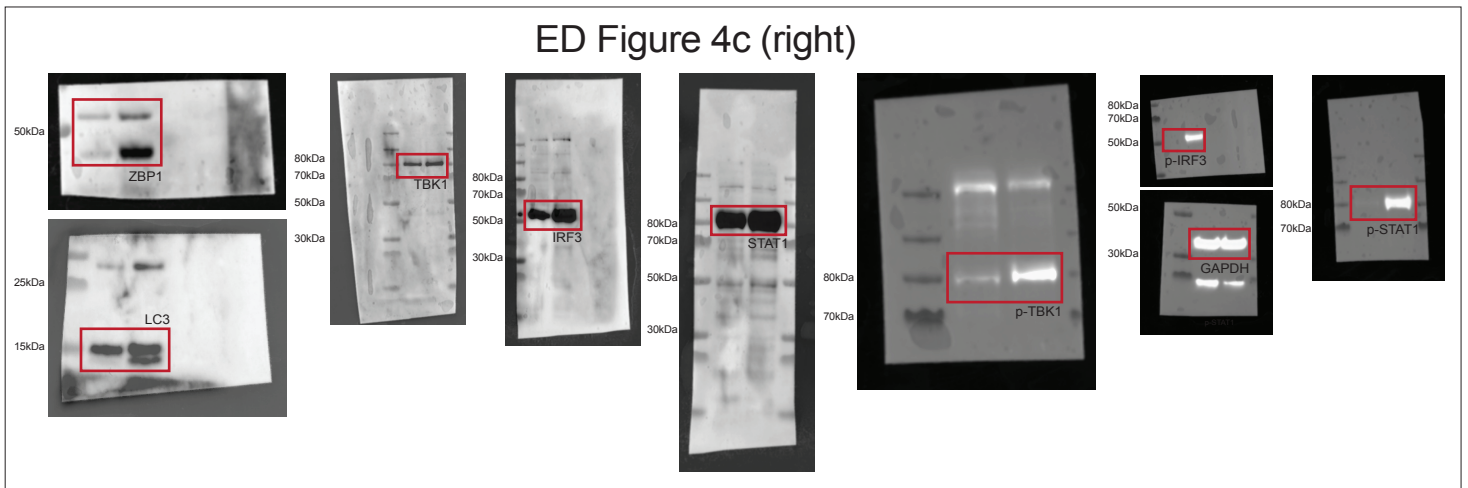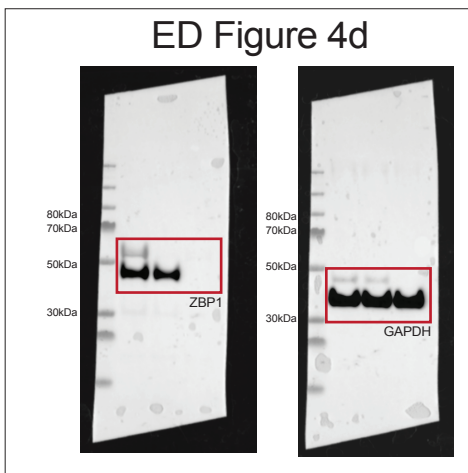

# SI Figure 3

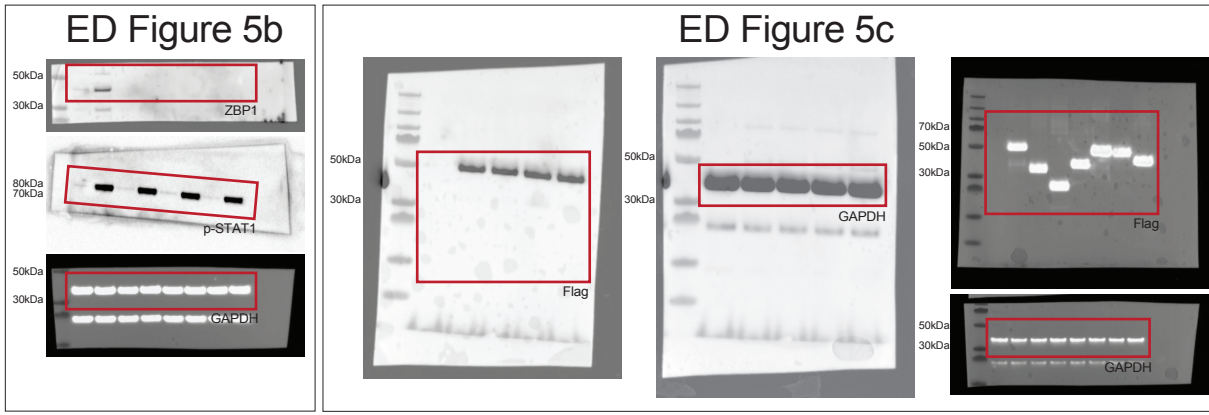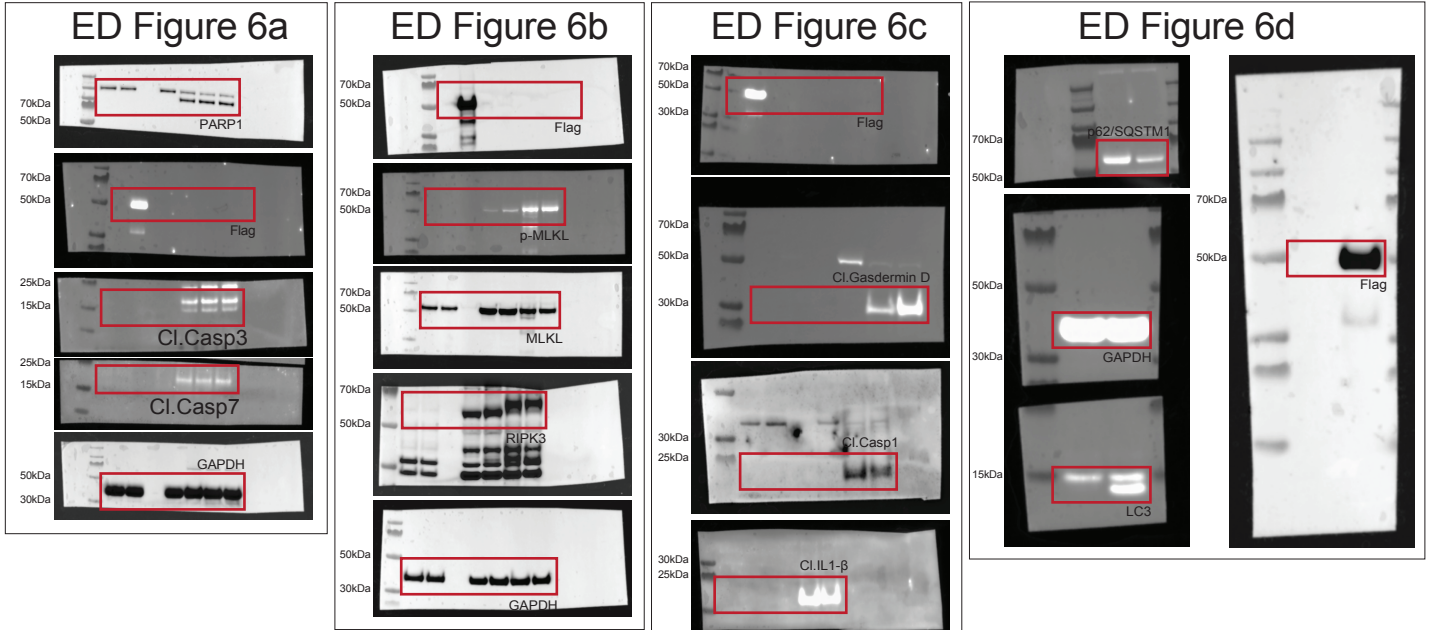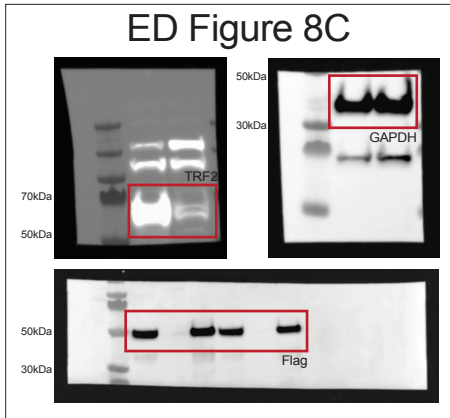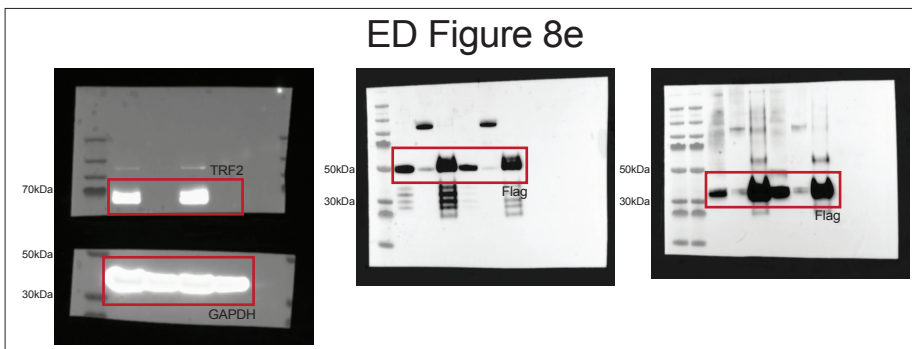

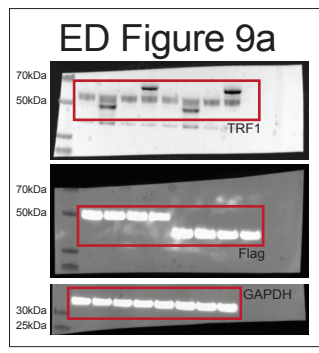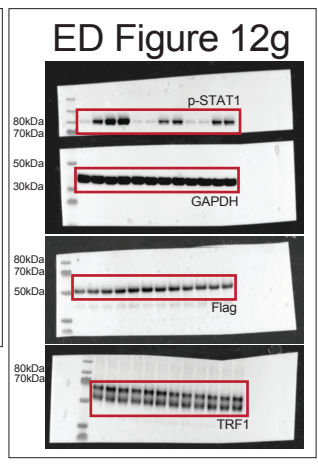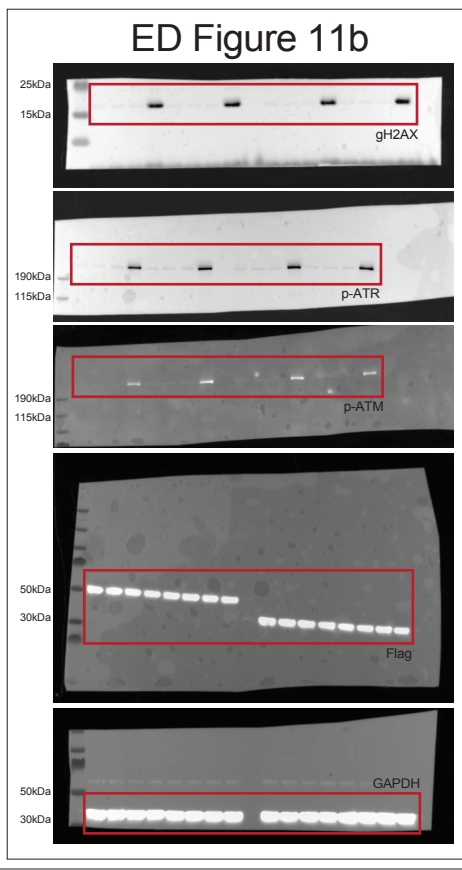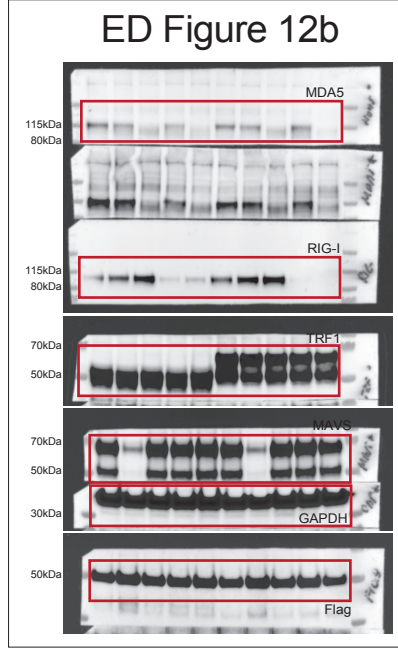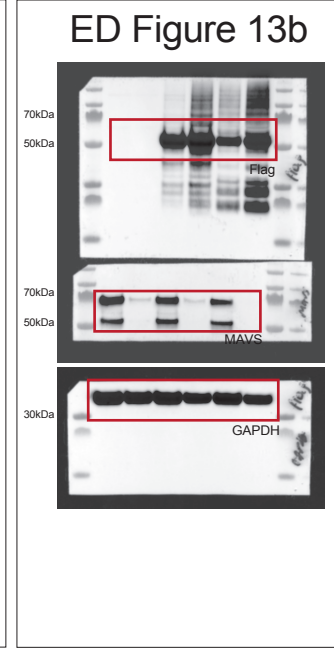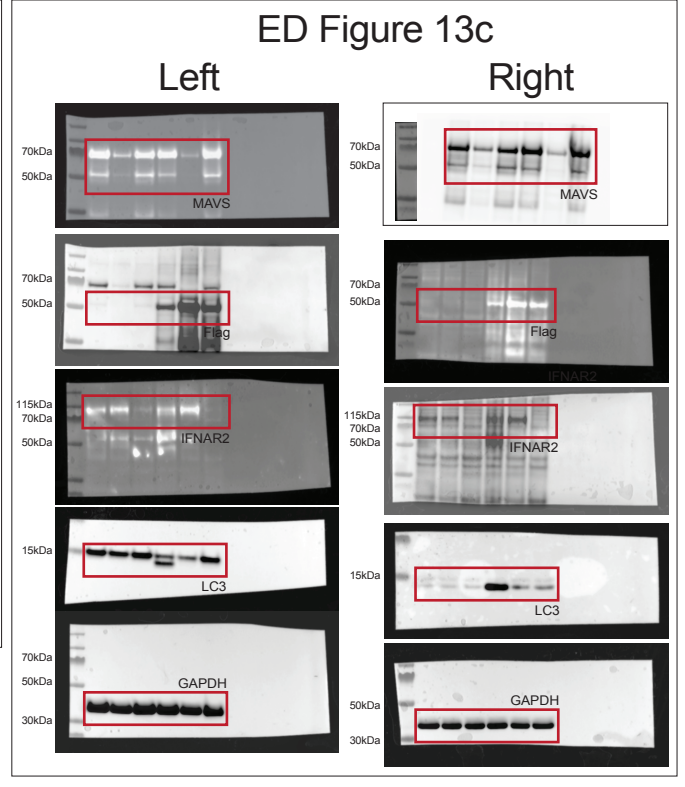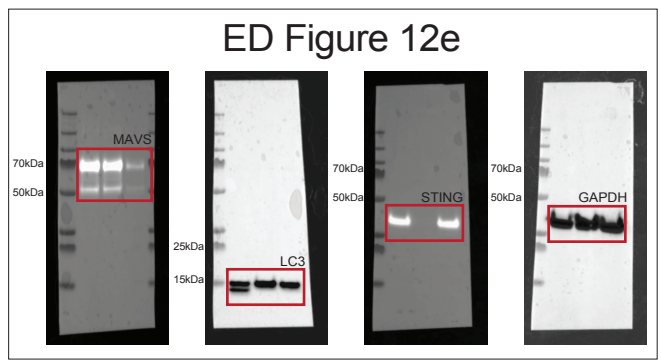

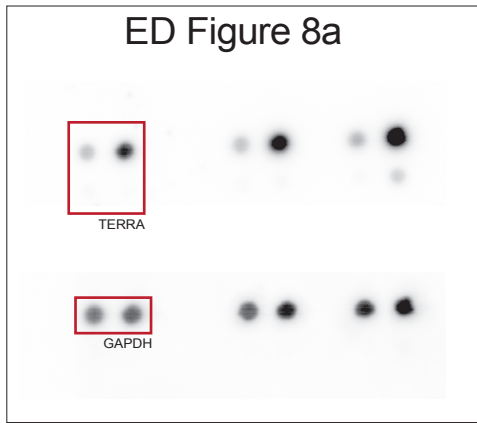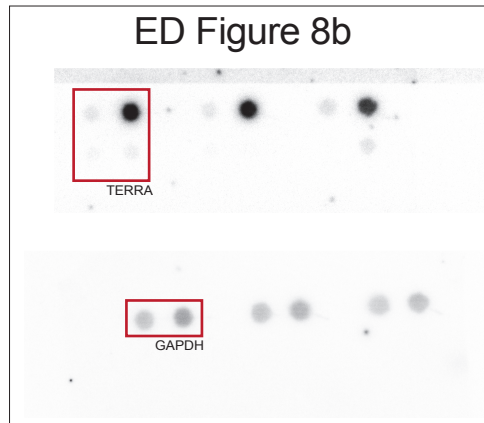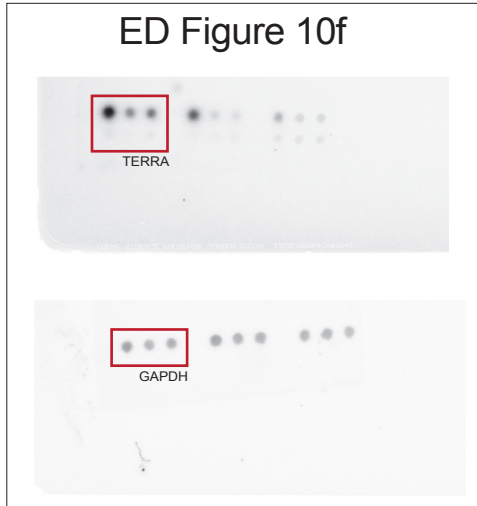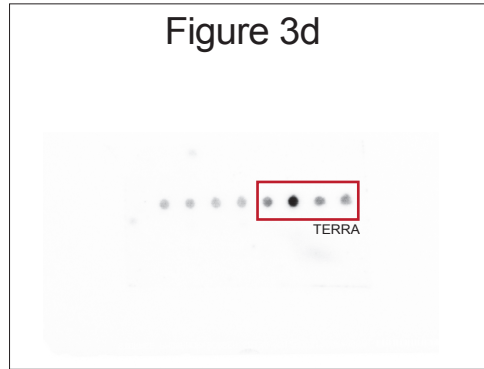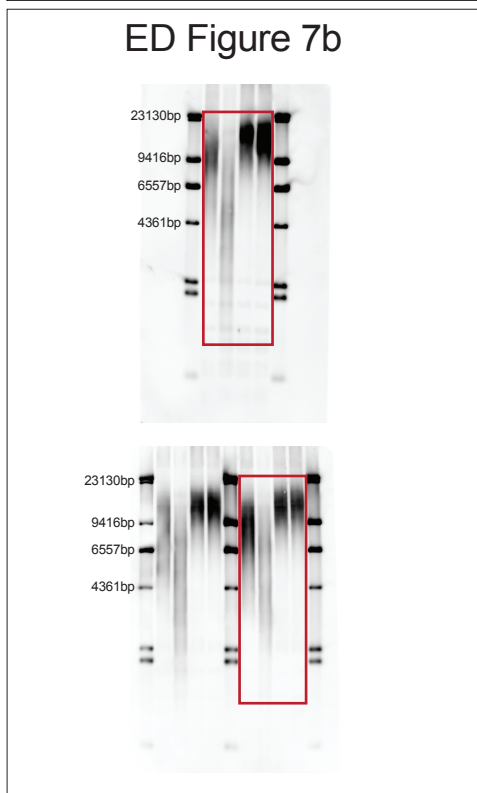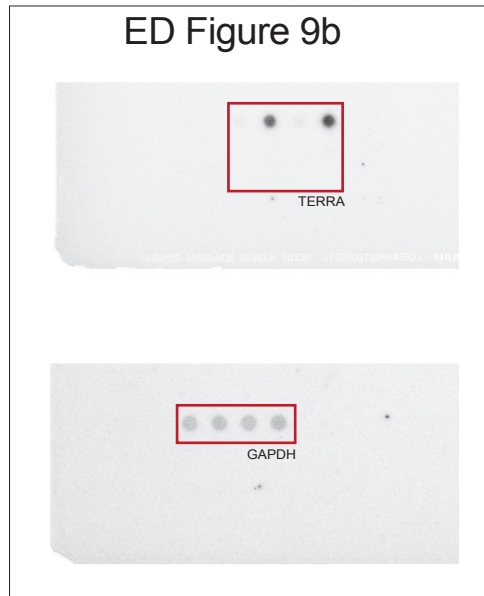

## SI Figure 6

List of enriched gRNAs with a log2 fold change &gt; 2 in both replicates (n=170)

| sgRNA       | FC (Replicate 1) | FC (Replicate 2) | Gene     |
|-------------|------------------|------------------|----------|
| BRUGEN23565 | 16.52924271      | 13.4438975       | KALRN    |
| BRUGEN51482 | 16.28180204      | 14.01981645      | ZBP1     |
| BRUGEN60319 | 15.97886721      | 17.17969         | STXBP5   |
| BRUGEN39230 | 13.99489956      | 9.222125505      | CDK5RAP1 |
| BRUGEN64293 | 13.21393925      | 9.919663583      | FAM9B    |
| BRUGEN69479 | 11.56455467      | 18.08529288      | PALM3    |
| BRUGEN22154 | 11.0617839       | 10.21406082      | LIPF     |
| BRUGEN14706 | 10.65257814      | 22.90625333      | PRB1     |
| BRUGEN09775 | 10.53436067      | 5.467736241      | ITGAD    |
| BRUGEN25179 | 10.49719549      | 4.230500274      | CXCL14   |
| BRUGEN07027 | 10.30110065      | 10.45419417      | GDF2     |
| BRUGEN45823 | 10.15510525      | 11.33384257      | LRRC7    |
| BRUGEN66268 | 10.09817923      | 11.04588281      | TECRL    |
| BRUGEN30228 | 9.810699591      | 9.98434783       | SLC7A9   |
| BRUGEN73171 | 9.359989352      | 7.741076113      | CDNF     |
| BRUGEN07825 | 9.129640913      | 4.626015919      | CXCL3    |
| BRUGEN11663 | 9.022051094      | 5.542893942      | MNT      |
| BRUGEN09705 | 8.72627877       | 4.668059439      | IRF3     |
| BRUGEN16971 | 8.47484659       | 5.750428534      | CCL4     |
| BRUGEN57397 | 8.334062999      | 4.731074347      | MB21D1   |
| BRUGEN27931 | 8.303823523      | 5.813952307      | NOD1     |
| BRUGEN45664 | 8.283263224      | 4.288806119      | MAVS     |
| BRUGEN69100 | 8.240559202      | 8.412907163      | ZC3H12D  |
| BRUGEN33183 | 8.188079984      | 6.847104281      | CHST5    |
| BRUGEN28062 | 8.021982733      | 7.941816086      | RBM14    |
| BRUGEN50930 | 8.020777167      | 6.058754354      | ALPK1    |
| BRUGEN41636 | 7.891255188      | 4.338897385      | AKIRIN2  |
| BRUGEN29828 | 7.818190743      | 4.117045154      | IL24     |
| BRUGEN69081 | 7.77598133       | 8.245880665      | TMEM173  |
| BRUGEN34475 | 7.773342807      | 8.820661865      | ANKRD17  |
| BRUGEN08051 | 7.554932377      | 8.094777681      | GYS1     |
| BRUGEN51484 | 7.488900056      | 11.749319        | ZBP1     |
| BRUGEN09721 | 7.353741853      | 4.887147568      | IRF7     |
| BRUGEN09453 | 7.340992486      | 8.404800552      | CXCL8    |
| BRUGEN09252 | 7.155325433      | 5.879855491      | IFNAR1   |
| BRUGEN28502 | 6.788540577      | 4.073442412      | CXCL13   |
| BRUGEN16973 | 6.775748232      | 5.128161819      | CCL5     |
| BRUGEN28588 | 6.658822756      | 5.587697823      | MTHFS    |
| BRUGEN22954 | 6.655594275      | 5.226231396      | RIOK3    |
| BRUGEN28845 | 6.639821784      | 4.961666643      | CXCR6    |
| BRUGEN17011 | 6.591877302      | 4.266515897      | CCL18    |
| BRUGEN01604 | 6.590936434      | 5.424043065      | BBS4     |
| BRUGEN09681 | 6.519130997      | 4.53211718       | IRAK1    |

|             |             |             |           |
|-------------|-------------|-------------|-----------|
| BRUGEN67759 | 6.506612866 | 5.166281814 | CXCL17    |
| BRUGEN02600 | 6.502673895 | 4.14042414  | CD14      |
| BRUGEN28571 | 6.501314625 | 4.522773061 | IFITM2    |
| BRUGEN27582 | 6.435440823 | 4.38235593  | AKAP8     |
| BRUGEN17005 | 6.338713233 | 4.580522641 | CCL17     |
| BRUGEN11352 | 6.309526607 | 4.772985803 | MAP3K5    |
| BRUGEN28162 | 6.185425562 | 5.503667188 | CLEC10A   |
| BRUGEN60177 | 6.122106099 | 4.157170456 | PRRC1     |
| BRUGEN09258 | 6.102840283 | 5.546911167 | IFNAR2    |
| BRUGEN26236 | 5.884771601 | 6.105015639 | TRIM66    |
| BRUGEN16964 | 5.866982748 | 4.319532542 | CCL3      |
| BRUGEN74970 | 5.859263836 | 5.616503281 | CCDC175   |
| BRUGEN09612 | 5.751167402 | 6.613801853 | CXCL10    |
| BRUGEN42573 | 5.748773268 | 5.562717757 | SLC35E3   |
| BRUGEN39540 | 5.711998091 | 4.346836294 | IL17D     |
| BRUGEN04489 | 5.708095929 | 4.730652913 | DGKA      |
| BRUGEN54665 | 5.691036763 | 4.87634195  | DISP1     |
| BRUGEN55100 | 5.685274031 | 5.508521688 | SERPINB11 |
| BRUGEN20683 | 5.65599792  | 6.669538741 | ZNF138    |
| BRUGEN42695 | 5.623909341 | 6.899744139 | STAB2     |
| BRUGEN17049 | 5.623116429 | 5.604071255 | CXCL5     |
| BRUGEN07584 | 5.585939944 | 6.246052457 | GPER1     |
| BRUGEN72587 | 5.450410556 | 4.364483663 | IFITM10   |
| BRUGEN13276 | 5.409217236 | 5.815723608 | PAK1      |
| BRUGEN07523 | 5.39489073  | 7.856981555 | CXCR3     |
| BRUGEN61494 | 5.375288425 | 6.872615704 | HAPLN3    |
| BRUGEN58271 | 5.364787675 | 5.645232685 | ARL14EP   |
| BRUGEN72442 | 5.358151098 | 6.543153369 | C8orf59   |
| BRUGEN22176 | 5.352584635 | 4.384983137 | IFITM1    |
| BRUGEN60514 | 5.343059705 | 6.99341914  | ADHFE1    |
| BRUGEN68496 | 5.333501187 | 6.849608718 | TRIM59    |
| BRUGEN05316 | 5.317519925 | 4.68391798  | EEF1D     |
| BRUGEN42139 | 5.311239709 | 6.15613453  | PSPC1     |
| BRUGEN62694 | 5.277219909 | 4.214827753 | MGAT4D    |
| BRUGEN57398 | 5.272575113 | 8.993357947 | MB21D1    |
| BRUGEN15535 | 5.225991327 | 7.318125413 | PTX3      |
| BRUGEN20268 | 5.217643447 | 6.145506411 | WNT5A     |
| BRUGEN25959 | 5.209394392 | 6.000216313 | MATR3     |
| BRUGEN27184 | 5.177128069 | 6.265590048 | TRIM28    |
| BRUGEN09372 | 5.1579951   | 6.386460475 | IL1A      |
| BRUGEN19279 | 5.133772647 | 4.877663034 | TLR2      |
| BRUGEN71153 | 5.115351396 | 4.431856355 | LYSMD1    |
| BRUGEN27597 | 5.080171644 | 6.713646892 | NET1      |
| BRUGEN34502 | 5.077587996 | 4.97754299  | LSM14A    |
| BRUGEN53409 | 5.074086591 | 5.455407666 | TMEM246   |



|             |             |                      |
|-------------|-------------|----------------------|
| BRUGEN12692 | 5.044695113 | 4.915981395 NONO     |
| BRUGEN00781 | 5.009071077 | 7.923322092 ANG      |
| BRUGEN39201 | 4.995244147 | 16.11192047 MRPL48   |
| BRUGEN57192 | 4.995244147 | 10.74128032 GPRIN1   |
| BRUGEN04480 | 4.947967787 | 4.187441515 CD55     |
| BRUGEN62006 | 4.908832742 | 6.38237706 SYT6      |
| BRUGEN11492 | 4.883724954 | 7.852752914 CXCL9    |
| BRUGEN29060 | 4.875407403 | 6.677660305 MASP2    |
| BRUGEN00773 | 4.834174038 | 4.242828996 AMY2A    |
| BRUGEN56324 | 4.811571083 | 7.211077004 DPH7     |
| BRUGEN06722 | 4.794176163 | 6.872615704 GAB1     |
| BRUGEN19286 | 4.791172144 | 5.623794799 TLR4     |
| BRUGEN44431 | 4.785468472 | 4.546832291 TCEAL7   |
| BRUGEN09498 | 4.771950447 | 4.307739196 IL12B    |
| BRUGEN26729 | 4.749851909 | 4.530231595 HDAC6    |
| BRUGEN07820 | 4.746183757 | 7.700051432 CXCL2    |
| BRUGEN09263 | 4.733650589 | 5.033384308 IFNB1    |
| BRUGEN21001 | 4.698857749 | 7.894177258 CXCR4    |
| BRUGEN09461 | 4.691802244 | 4.052140074 IL9      |
| BRUGEN49424 | 4.678100567 | 4.00320118 NDNF      |
| BRUGEN39781 | 4.6367359   | 4.370817979 TLR9     |
| BRUGEN73285 | 4.619382051 | 4.663694466 BPY2B    |
| BRUGEN12005 | 4.584449829 | 4.802382486 MYD88    |
| BRUGEN16982 | 4.576262523 | 5.433993616 CCL8     |
| BRUGEN63307 | 4.575938644 | 6.719759009 PATE1    |
| BRUGEN28844 | 4.567223832 | 8.89326042 CXCR6     |
| BRUGEN07184 | 4.544518698 | 4.614595585 GLA      |
| BRUGEN17077 | 4.534208412 | 6.123067386 CXCL12   |
| BRUGEN09434 | 4.516154719 | 5.639542706 IL6      |
| BRUGEN33833 | 4.511025547 | 6.235755685 TXN2     |
| BRUGEN30681 | 4.497333227 | 4.566255557 TREX1    |
| BRUGEN52639 | 4.480408874 | 5.48002035 TTC29     |
| BRUGEN66242 | 4.471904807 | 4.492942886 IL27     |
| BRUGEN51690 | 4.461378392 | 6.541556657 TRIM11   |
| BRUGEN16976 | 4.455646936 | 5.626015919 CCL7     |
| BRUGEN23854 | 4.448037362 | 4.989319015 USP14    |
| BRUGEN03069 | 4.439304205 | 7.95486825 CFL2      |
| BRUGEN15674 | 4.431056033 | 7.932485377 MAP4K2   |
| BRUGEN32233 | 4.415817046 | 6.585475959 KIAA1024 |
| BRUGEN31949 | 4.40746648  | 8.195256587 TTLL12   |
| BRUGEN65922 | 4.39335196  | 5.609174492 FOXC1    |
| BRUGEN35996 | 4.377947747 | 4.360125358 HPGDS    |
| BRUGEN47965 | 4.359045793 | 6.248841418 (MARC1)  |
| BRUGEN09466 | 4.354413076 | 6.582479257 CXCR2    |
| BRUGEN16984 | 4.347204556 | 8.130495921 CCL11    |

|             |             |             |                       |
|-------------|-------------|-------------|-----------------------|
| BRUGEN51522 | 4.338286744 | 4.370753862 | OR8J3                 |
| BRUGEN18344 | 4.33369833  | 4.931411434 | STAT2                 |
| BRUGEN66985 | 4.326119026 | 5.2655432   | TAS2R41               |
| BRUGEN20318 | 4.318299222 | 4.408336381 | WRN                   |
| BRUGEN42458 | 4.31395358  | 4.424081671 | HEMGN                 |
| BRUGEN32076 | 4.311579951 | 4.01751838  | PLEKHM2               |
| BRUGEN16696 | 4.301963885 | 4.162733469 | RYR1                  |
| BRUGEN57375 | 4.297221399 | 5.537639209 | TSGA13                |
| BRUGEN36513 | 4.263402827 | 4.630018096 | TBK1                  |
| BRUGEN08480 | 4.245193337 | 4.023765651 | HMGB2                 |
| BRUGEN57999 | 4.239444492 | 4.705488608 | TRIM6                 |
| BRUGEN26510 | 4.231429294 | 4.325681928 | EXOGEN                |
| BRUGEN08344 | 4.207225867 | 4.379887722 | UBE2K                 |
| BRUGEN76959 | 4.205292608 | 12.43363886 | Non-Targeting_Control |
| BRUGEN09422 | 4.199279366 | 6.477839853 | ANKLE1                |
| BRUGEN06715 | 4.196392916 | 7.375381295 | XRCC6                 |
| BRUGEN17040 | 4.189562907 | 5.372894241 | CXCL6                 |
| BRUGEN46545 | 4.176372227 | 4.14979764  | NLRC4                 |
| BRUGEN25455 | 4.172513429 | 8.933798974 | IKBKE                 |
| BRUGEN36389 | 4.163236727 | 7.81564441  | SETD2                 |
| BRUGEN12963 | 4.147726078 | 4.949214213 | OAS2                  |
| BRUGEN62535 | 4.13990361  | 4.744648999 | DTX3L                 |
| BRUGEN31326 | 4.135130841 | 8.823085216 | TRIM32                |
| BRUGEN73674 | 4.128325618 | 4.965182359 | FAM110C               |
| BRUGEN70828 | 4.118736198 | 4.603383625 | IFITM5                |
| BRUGEN49584 | 4.115239073 | 5.359715015 | NLRX1                 |
| BRUGEN23131 | 4.110755172 | 5.037214487 | CD84                  |
| BRUGEN11618 | 4.096257661 | 5.054574576 | MMP12                 |
| BRUGEN59369 | 4.090493288 | 5.414217259 | HMGB4                 |
| BRUGEN27992 | 4.087194785 | 4.195464085 | IFITM3                |
| BRUGEN54836 | 4.058355003 | 8.060707249 | ZCCHC3                |
| BRUGEN18341 | 4.05426138  | 5.742631276 | STAT1                 |
| BRUGEN72006 | 4.042347568 | 6.172768253 | USP17L8               |
| BRUGEN09430 | 4.023658953 | 4.601343393 | IL5RA                 |
| BRUGEN11553 | 4.021620506 | 4.483990555 | AFF1                  |
| BRUGEN01750 | 4.020242142 | 6.24117984  | CXCR5                 |
| BRUGEN59979 | 4.014569383 | 7.399314883 | TMEM42                |
